# Supplementary material
Source: PubMed Central journal article supplement (PMC3527657)
Supplement: NIHMS420714-supplement-13414_2012_383_MOESM1_ESM.pdf [file NIHMS420714-supplement-13414_2012_383_MOESM1_ESM.pdf]

Supplemental Data for the Re-Revision of PP-Orig-11-104.R1

“Estimating Working Memory Capacity for Lists of Nonverbal Sounds”

Dawei Li, Nelson Cowan, and J. Scott Saults

**Contents**

Supplementary Table 1 (ANOVA Table, Experiment 1)

Supplementary Table 2 (ANOVA Table, Experiment 2)

Supplementary Table 3 (ANOVA Table, Experiment 3)

Supplementary Figure 1 (Effect of tone change magnitude in Experiments 1 and 3, with different data grouping than in the manuscript.)

Supplementary Table 1

*Two-way ANOVA table for Experiment 1. The dependent variable is accuracy.*

| Source                                      | Sum of Squares | Degree of Freedom | Mean Square | F     | p    | partial $\eta^2$ |
|---------------------------------------------|----------------|-------------------|-------------|-------|------|------------------|
| Subjects                                    | 2.29           | 26                | .088        |       |      |                  |
| Set Size                                    | .45            | 4                 | .11         | 15.39 | .000 | 0.37             |
| Articulation Condition                      | .050           | 1                 | .050        | 4.54  | .043 | .15              |
| Set Size * Articulation Condition           | .039           | 4                 | .0097       | 1.18  | .33  | .043             |
| Set Size * Subjects                         | .76            | 104               | .0073       |       |      |                  |
| Articulation Condition * Subjects           | .28            | 26                | .011        |       |      |                  |
| Set Size * Articulation Condition * Subject | .86            | 104               | .0083       |       |      |                  |
| Residual (Total)                            | 1.90           | 234               | .0081       |       |      |                  |
| Total                                       | 4.73           | 269               |             |       |      |                  |

Supplementary Table 2

*Two-way ANOVA table for Experiment 2. The dependent variable is accuracy.*

| Source                                      | Sum of Squares | Degree of Freedom | Mean Square | F     | p    | partial $\eta^2$ |
|---------------------------------------------|----------------|-------------------|-------------|-------|------|------------------|
| Subjects                                    | .90            | 23                | .039        |       |      |                  |
| Set Size                                    | .78            | 4                 | .19         | 18.24 | .000 | .44              |
| Articulation Condition                      | .13            | 1                 | .13         | 12.74 | .001 | .36              |
| Set Size * Articulation Condition           | .047           | 4                 | .012        | 1.59  | .18  | .065             |
| Set Size * Subjects                         | .99            | 92                | .011        |       |      |                  |
| Articulation Condition * Subjects           | .23            | 23                | .010        |       |      |                  |
| Set Size * Articulation Condition * Subject | .68            | 92                | .0073       |       |      |                  |
| Residual (Total)                            | 1.90           | 207               | .0092       |       |      |                  |
| Total                                       | 3.76           | 239               |             |       |      |                  |

Supplementary Table 3

*Two-way ANOVA table for Experiment 3. The dependent variable is accuracy.*

| Source                                      | Sum of Squares | Degree of Freedom | Mean Square | F     | p    | partial $\eta^2$ |
|---------------------------------------------|----------------|-------------------|-------------|-------|------|------------------|
| Subjects                                    | 20.74          | 108               | .19         |       |      |                  |
| Set Size                                    | 2.29           | 4                 | .57         | 74.09 | .000 | .41              |
| Articulation Condition                      | .22            | 1                 | .22         | 23.69 | .000 | .18              |
| Set Size * Articulation Condition           | .026           | 4                 | .0064       | .93   | .45  | .0085            |
| Set Size * Subjects                         | 3.34           | 432               | .0077       |       |      |                  |
| Articulation Condition * Subjects           | .99            | 108               | .0092       |       |      |                  |
| Set Size * Articulation Condition * Subject | 2.97           | 432               | .0069       |       |      |                  |
| Residual (Total)                            | 7.3            | 972               | .0075       |       |      |                  |
| Total                                       | 30.58          | 1089              |             |       |      |                  |

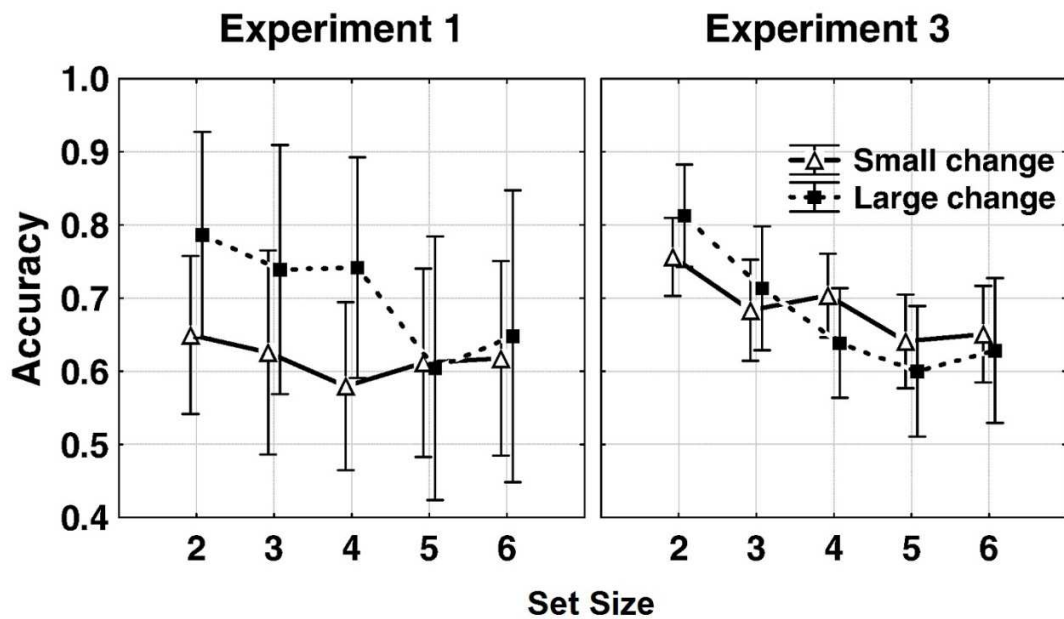

**Supplementary Figure 1.** Effect of tone change magnitude in Experiments 1 and 3, with different data grouping than in the manuscript. **Left-hand panel**, Experiment 1; **right-hand panel**, Experiment 3. The solid lines with open triangles denote the small tone change magnitude, and the dashed lines with solid squares denote the large tone change magnitude. The small tone change magnitude group includes trials with a frequency difference of 1 to 5 tones apart, and the large tone change magnitude group includes trials with a frequency difference of 7 to 11 tones apart. The error bars represent 95% repeated-measure confidence intervals (Hollands & Jarmasz, 2010). The only significant effect involving experiment group as a factor was a two-way interaction of experiment group by tone change magnitude,  $F(1,79)=8.71$ ,  $\eta_p^2=.10$ ,  $p<.01$ .
